# Supplementary material for: A relationship between species richness and evenness that depends on specific relative abundance distribution
Source: PeerJ. 2018 Jun 12;6:e4951. doi: 10.7717/peerj.4951 (PMC6003394; doi:10.7717/peerj.4951)
Supplement: Supplemental Information 5 — Raw data from three sources. [file peerj-06-4951-s005.xlsx]

## Sheet: Brids Haila 1983
Rank	Sample 1	Sample 2	Sample 3	Sample 4	Sample 5	Sample 6	Sample 7	Sample 8	Sample 9	Sample 10	Sample 11	Sample 12	Sample 13	Sample 14	Sample 15	Sample 16	Sample 17	Sample 18	Sample 19	Sample 20	Sample 21
1	31	24	13	28	34	30	309	370	316	25	33	12	87	121	104	232	221	72	914	987	893
2	24	21	7	9	13	10	107	153	72	11	10	5	34	20	19	72	82	27	291	404	285
3	22	13	6	8	9	5	96	140	54	8	7	3	28	18	13	53	64	19	268	277	255
4	12	9	5	7	5	4	72	76	51	8	5	3	17	17	13	44	35	14	232	240	206
5	5	4	4	7	5	3	71	52	41	5	4	3	16	16	13	40	28	13	223	226	167
6	5	4	2	5	4	3	63	48	35	5	4	3	14	11	13	36	28	12	220	190	163
7	4	3	1	4	3	3	60	47	34	4	3	3	12	10	12	32	26	10	205	175	162
8	4	2	1	3	3	3	45	39	27	4	3	2	12	9	10	26	25	9	190	156	146
9	3	2	1	3	3	3	39	34	26	4	3	2	11	8	9	20	22	9	176	142	144
10	3	1	1	3	3	3	38	32	25	3	2	2	9	7	7	17	20	7	165	119	138
11	3	1	1	2	2	2	28	30	20	2	2	1	6	7	7	14	18	6	164	114	133
12	3	1		2	2	2	26	30	19	2	2	1	5	6	6	13	18	6	143	103	127
13	2	1		2	2	2	24	24	18	1	2	1	4	4	6	13	16	5	130	101	119
14	2			1	1	2	22	24	18	1	2	1	3	4	6	11	16	5	119	91	104
15	1			1	1	2	17	20	16	1	1	1	3	4	5	11	15	4	104	76	101
16	1			1	1	2	17	19	16		1	1	3	3	5	10	15	4	79	76	90
17	1				1	1	16	19	16		1		3	3	5	9	15	4	75	68	76
18					1	1	15	16	15		1		2	2	4	9	12	4	68	66	71
19						1	14	13	12		1		2	2	3	7	12	4	66	62	66
20						1	13	12	11		1		2	2	3	6	11	4	66	60	64
21							10	9	11		1		1	2	3	6	10	4	62	60	64
22							8	9	7				1	2	2	6	9	3	57	59	63
23							8	8	6				1	2	2	6	9	3	55	59	59
24							7	7	5				1	1	2	6	7	3	54	57	57
25							7	6	5				1	1	2	6	5	3	49	51	53
26							6	6	5				1	1	1	5	5	3	47	50	53
27							6	5	5				1	1	1	5	4	2	46	47	49
28							6	5	3				1	1	1	5	4	2	46	45	44
29							5	5	2				1	1	1	5	4	2	45	41	44
30							5	5	2				1		1	5	3	2	45	39	43
31							5	4	2						1	3	3	2	43	39	43
32							5	4	2						1	3	3	2	42	36	41
33							4	3	1						1	3	2	1	41	33	40
34							4	2	1							3	2	1	36	33	37
35							4	2	1							2	2	1	35	32	34
36							3	2	1							2	1	1	35	29	32
37							3	2	1							2	1	1	34	28	30
38							3	2	1							2	1	1	33	28	30
39							1	2	1							2	1	1	32	28	29
40							1	1	1							2	1		31	27	28
41							1	1								2	1		31	22	25
42							1	1								2	1		30	21	23
43							1	1								2	1		29	20	20
44							1	1								2	1		26	19	19
45							1	1								2			24	15	15
46								1								2			20	14	14
47																1			15	13	14
48																1			15	12	14
49																1			14	11	14
50																1			13	11	13
51																1			12	8	13
52																			12	5	11
53																			11	4	10
54																			10	4	9
55																			9	2	8
56																			5	2	7
57																			4	2	6
58																			3	2	6
59																			1	1	3
60																			1	1	2
61																			1	1	2
62																			1	1	1
63																			1	1	1
64																			1	1	1
65																			1	1
66																			1	1
67																			1	1
68																			1
69																			1

## Sheet: Fish Harrel 1967
Rank	Sample 1	Sample 2	Sample 3	Sample 4	Sample 5	Sample 6	Sample 7	Sample 8	Sample 9	Sample 10	Sample 11	Sample 12	Sample 13	Sample 14	Sample 15	Sample 16	Sample 17	Sample 18	Sample 19	Sample 20	Sample 21	Sample 22	Sample 23	Sample 24	Sample 25	Sample 26	Sample 27	Sample 28	Sample 29	Sample 30	Sample 31	Sample 32	Sample 33	Sample 34
1	91	4	272	51	10	1	8	5	2	41	155	4	5	65	44	2	2	4	13	10	3	7	14	10	21	2	5	2	2	3	1	26	1	2
2	241	6	10	5	110	51	123	301	311	208	7	1	6	9	3	25	4	146	34	5	1	3	3	4	6	53	3	1	14	26	4	5	4	6
3	3	3		8	26	9	3	12	4	8	7	1	1	1	2	5	2	3	1	6	1	2	2	29	6	2	4	11	8	1	5	24	12	26
4	27	27		11	5	2	1	1	4	1	62	1	3	9	17	1	6	18	1	82	14		18	8	4	2	18	3	2	6	9	15	9	17
5	6	1		1	1	11	7	2	2	21	8	2	72	30	3	3	2	4	6		17		17	11	10	11	35	8	4	29	13	26	17	19
6					8	4	100	2	12	22		4	1	4	157	152	72		33		7		35	27	6	16	24	7	45	51	35	28	98	13
7						13	12	110	41	77		11	33	76	4	10	13		73		2		78	4	9	44	12	2	57	47	38	4	104	29
8						6	14	4	29	3		4	19	23	8	2	2		1		2		47	5	2	148	1	1	9	208	102	4	2	2
9						4		10	12			7	1	11	13	7	2						6			79	2		2	111	88	2	4	2
10								1	1			68	46	4	23	9	2										1		2	3	2		1	6
11									1			1	3	3	1	1	4										1			1	46			35
12												1		1	1	1														1	1			4
13												1		1		2														1

## Sheet: Zooplankton Akifumi 1996
Rank	Sample 1	Sample 2	Sample 3	Sample 4	Sample 5	Sample 6	Sample 7	Sample 8	Sample 9	Sample 10	Sample 11	Sample 12	Sample 13	Sample 14	Sample 15	Sample 16	Sample 17	Sample 18	Sample 19	Sample 20	Sample 21	Sample 22	Sample 23	Sample 24	Sample 25	Sample 26	Sample 27	Sample 28
1	74.2	71.3	34.7	56.2	47.8	36.7	1.7	96.6	25.6	0.2	7.1	75.7	0.4	0.7	74.8	4.3	7.1	3.8	2.6	0.6	0.6	0.4	1	0.3	10.6	20	2.8	0.4
2	1.5	0.2	1	7.5	0.2	3.8	28.1	3.1	0.5	14.2	19.3	0.2	42.3	33.8	5.3	2.2	3.6	1.9	15.4	5	1.1	8	4	1	58.8	13.3	40.9	0.4
3	15.5	8.1	1	0.7	2.8	4.3	9.2	0.3	0.2	74.1	2	0.2	0.2	0.7	11.1	2.2	57.1	1.9	17.9	13.1	2.9	22.7	36.4	0.7	0.4	66.7	0.3	2.4
4	0.7	4.5	1	13.4	48.7	23.9	0.2		0.2	0.8	16.2	0.2	53.2	0.7	6.3	2.2	3.6	1.9	7.7	0.6	0.6	0.4	7.1	1	30.3		0.6	96.2
5	0.5	0.5	62.4	18.7	0.2	28.1	4.9		0.2	10.5	50	0.2	3.9	0.7	1.7	4.3	7.1	19.2	12.8	4.4	2.3	68.5	47.5	15.3			44.9	0.4
6	7.6	15.5		0.1	0.4	0.8	4.9		73.1		2.8	4.6		61.3	0.7	8.7	21.4	1.9	10.3	13.1	0.6		4	11.1			10.5
7				3.2		2.4	2.8				2.6	6		0.7		50		59.6	30.8	0.6	0.6			70.5
8							48.2					2.8		1.4		4.3		9.6	2.6	4.4	8
9												7.9				21.7				13.8	0.6
10												0.3								0.6	73.1
11												2								1.3	4.6
12																				0.6	5.1
13																				0.6
14																				22.5
15																				18.8
16																				1.3
17																				8.1
